# Supplementary material
Source: PubMed Central journal article supplement (PMC6432715)
Supplement: joces-132-222331-s1.pdf [file joces-132-222331-s1.pdf]

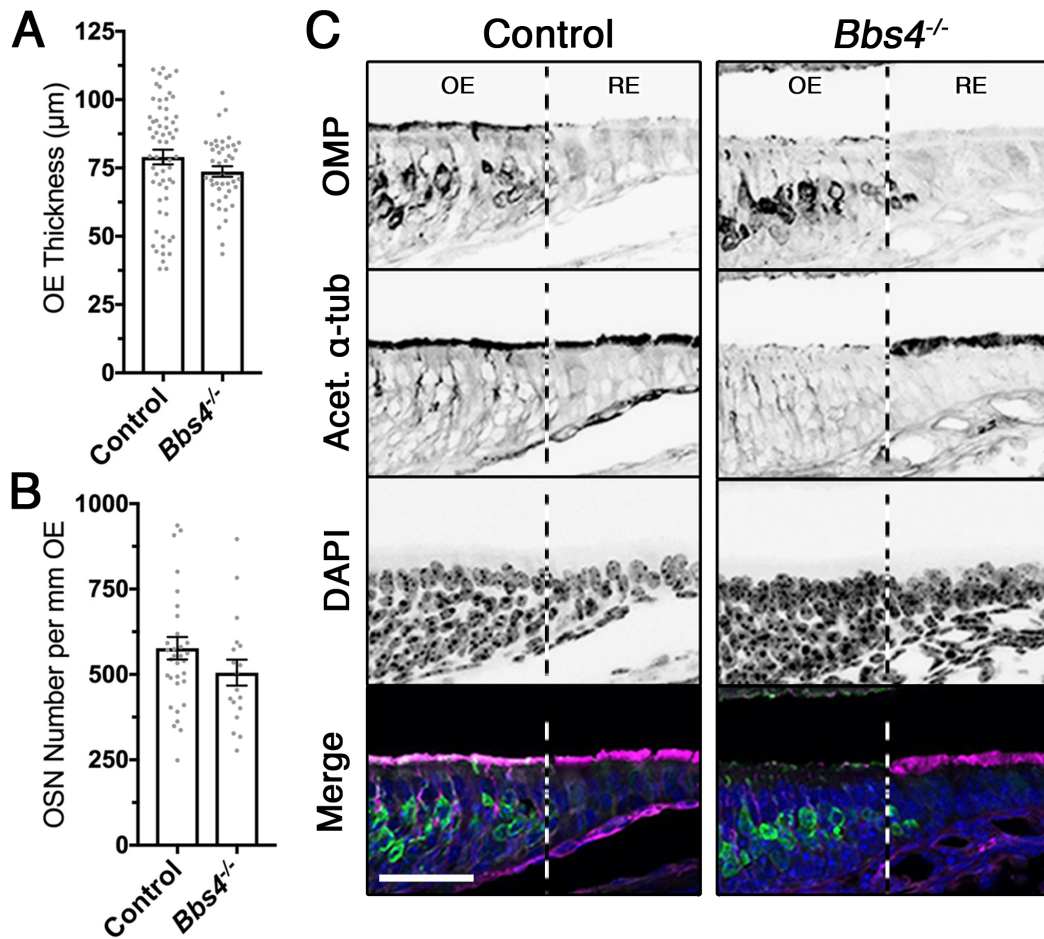

**Figure S1. OE thickness and OSN density are unchanged in *Bbs4*<sup>-/-</sup> mutant mice.**

(A) Quantification of OE thicknesses was unchanged between P20-35 control and *Bbs4*<sup>-/-</sup> mutant OE (n = 7 WT, 5 KO; t(104)=1.472, P=0.1440, Unpaired t-test). (B) Quantification of OSN counts per mm of OE was unchanged between P20-35 control and *Bbs4*<sup>-/-</sup> mutant OE (n = 7 WT, 5 KO; t(49)=1.357, P=0.1811, Unpaired t-test). (C) Representative sections of the olfactory and respiratory epithelia border from (left) control and (right) *Bbs4*<sup>-/-</sup> mutant mice, immunostained for (top) OMP, (middle-top) acetylated  $\alpha$ -tubulin, (middle-bottom) DAPI, and (bottom) merged. Dashed lines demarcate the OE and RE boundary. Scale bar = 40  $\mu$ m.

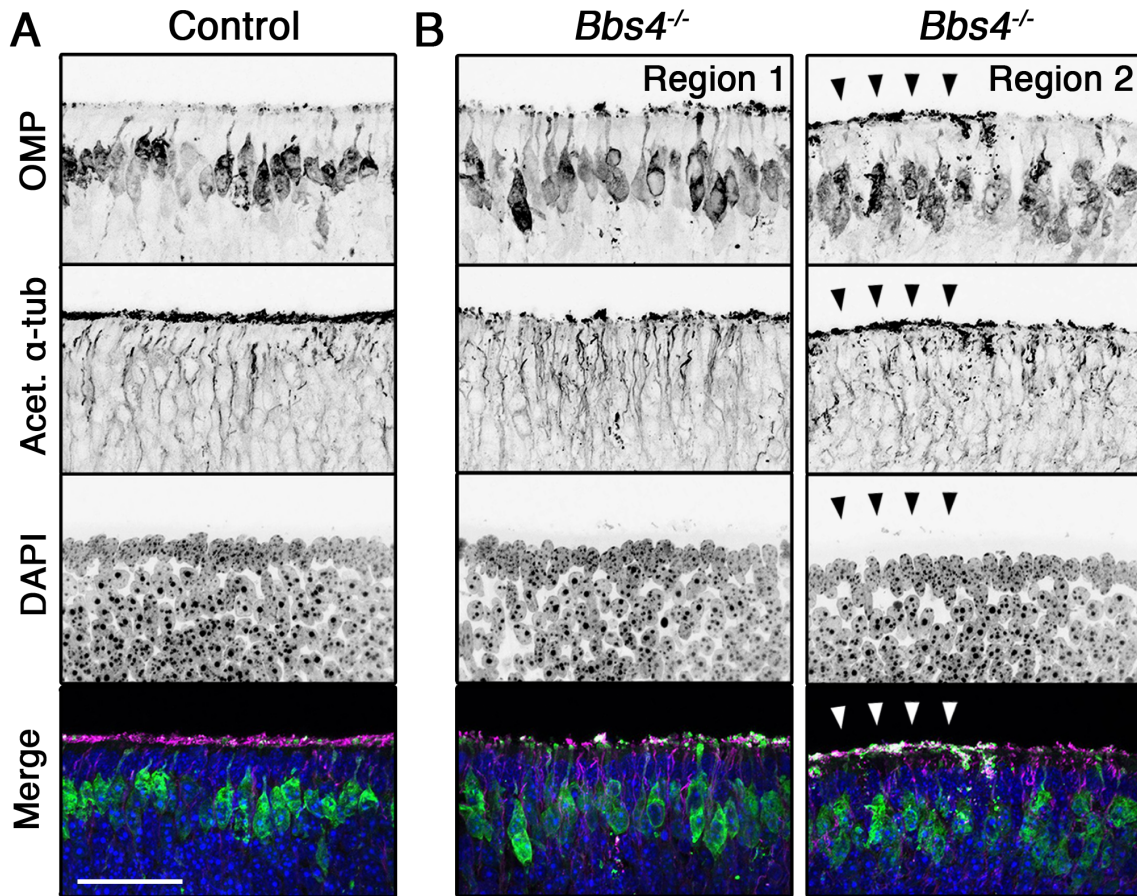

**Figure S2. Ciliary degeneration within early postnatal *Bbs4*<sup>-/-</sup> mutant OE.**

(A) Representative OE from postnatal 5-day-old (P5) (left) control and (middle, right) *Bbs4*<sup>-/-</sup> mutant mice immunostained for (top) OMP, (middle-top) acetylated  $\alpha$ -tubulin, (middle-bottom) DAPI, and (bottom) merged. Although *Bbs4*<sup>-/-</sup> mutant mice largely lack apical acetylated  $\alpha$ -tubulin immunostaining, some regions retain residual cilia (arrowheads). Scale bar = 40  $\mu$ m.

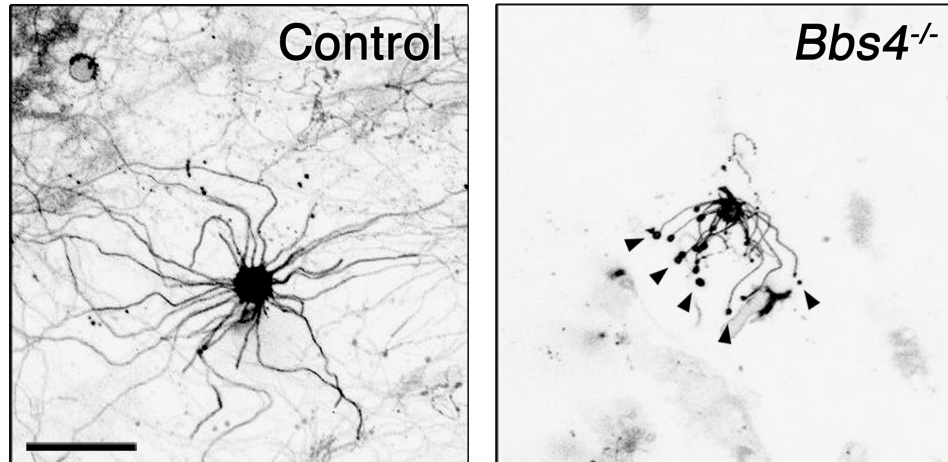

**Figure S3. *Bbs4*<sup>-/-</sup> mutant OSNs display enlargement of distal ciliary tips.**

Representative live *en face* confocal images of ectopically expressing myristoylated-palmitoylated-mCherry (MP-mCh) in OSN cilia from (left) control and (right) *Bbs4*<sup>-/-</sup> mutant mice. In rare instances, *Bbs4*<sup>-/-</sup> mutant OSNs exhibit engorged swellings at the ciliary tip (arrowheads), larger than those observed in some wild type control OSNs. Scale bar = 20  $\mu$ m.

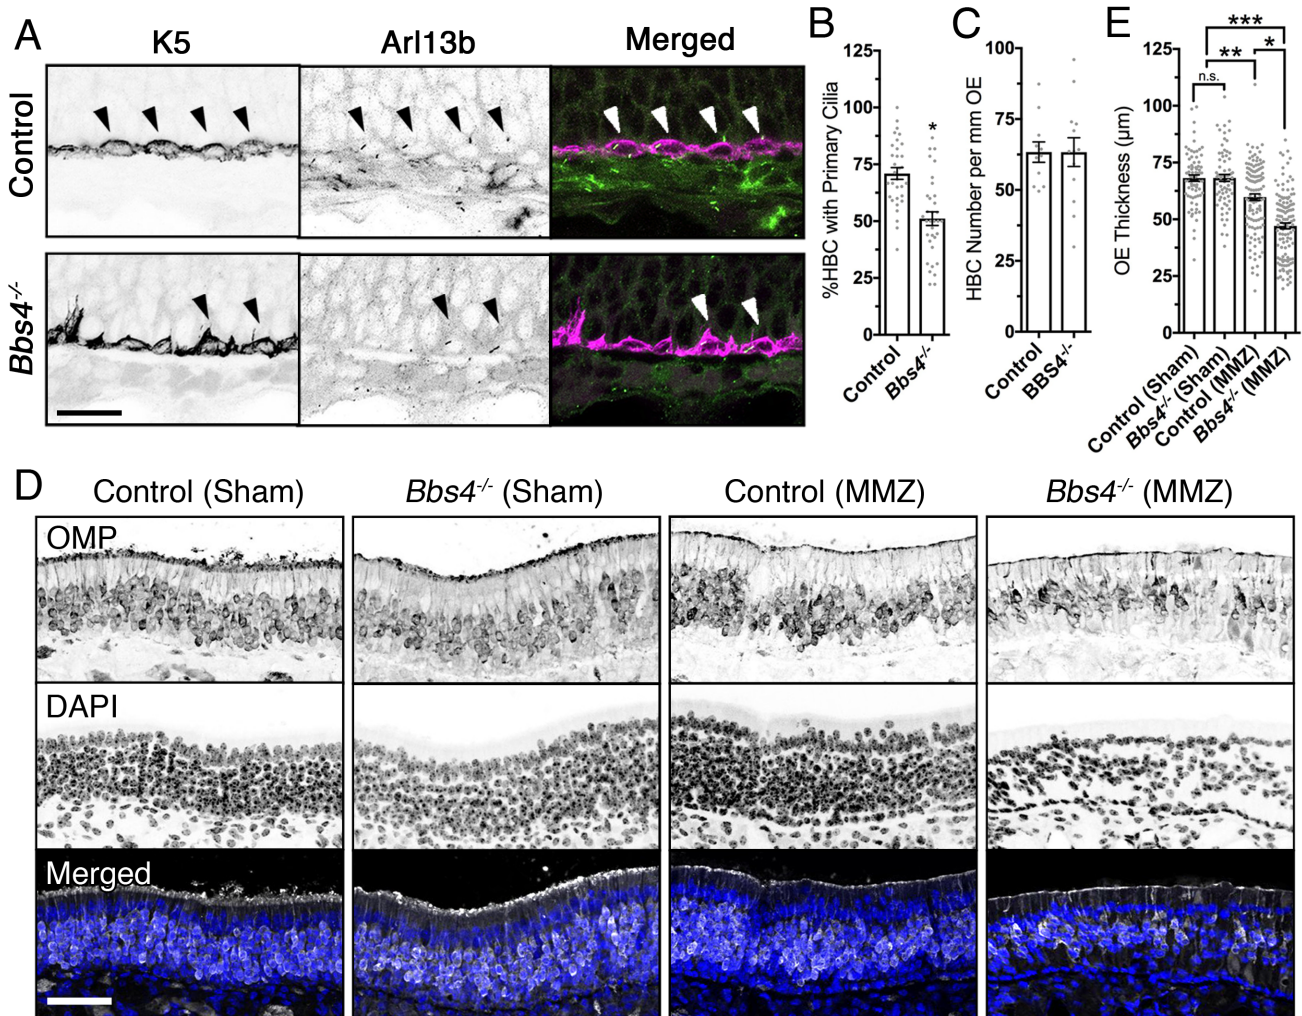

**Figure S4. *Bbs4*<sup>-/-</sup> mutant mice have reduced regenerative capacity after ablation.**

(A) Representative images of ciliated horizontal basal cells (HBCs; arrowheads) at the base of the OE from control (top) and *Bbs4*<sup>-/-</sup> mice (bottom). Tissue was immunostained for (left) cytokeratin-5 (K5) to label HBCs, (middle) Arl13b to label primary cilia, and (right) merged. (B) Quantification of ciliated HBCs demonstrated a 30% decrease in *Bbs4*<sup>-/-</sup> mice ( $71.0 \pm 2.6$  ciliated/total HBCs) compared to control ( $51.2 \pm 3.0$  ciliated/total HBCs;  $n = 4$  WT, 5 KO;  $t(64)=5.0$ , \*,  $P < 0.0001$ , Unpaired t-test). (C) Quantification of HBC number per millimeter of OE exhibited no difference between control ( $63.4 \pm 3.6$  cells/mm) and *Bbs4*<sup>-/-</sup> mice ( $63.3 \pm 5.1$  cells/mm;  $n = 4$  WT, 5 KO;  $t(22)=0.003$ ,  $P = 0.998$ , Unpaired t-test). (D) Representative cross sections of the OE immunostained for OMP from sham-treated control and *Bbs4*<sup>-/-</sup> mutant mice, and methimazole-treated control and *Bbs4*<sup>-/-</sup> mutant mice. (E) Quantification of OE thicknesses from sham treated control ( $68.14 \pm 1.39$  μm;  $n = 4$ ) and *Bbs4*<sup>-/-</sup> mutant ( $68.20 \pm 1.54$  μm;  $n = 5$ ), methimazole (MMZ)-treated control ( $59.75 \pm 1.44$  μm;  $n = 4$ ) and *Bbs4*<sup>-/-</sup> mutant ( $47.1 \pm 1.32$  μm;  $n = 4$ ) ( $F(3,382)=49.91$ ,  $P < 0.0001$ , One-way ANOVA, Tukey Post-hoc, n.s.,  $P > 0.05$ , \*,  $P < 0.0001$ , \*\*,  $P < 0.0005$ , \*\*\*,  $P < 0.0001$ ). Scale bar = 5 μm (A), 50 μm (D).

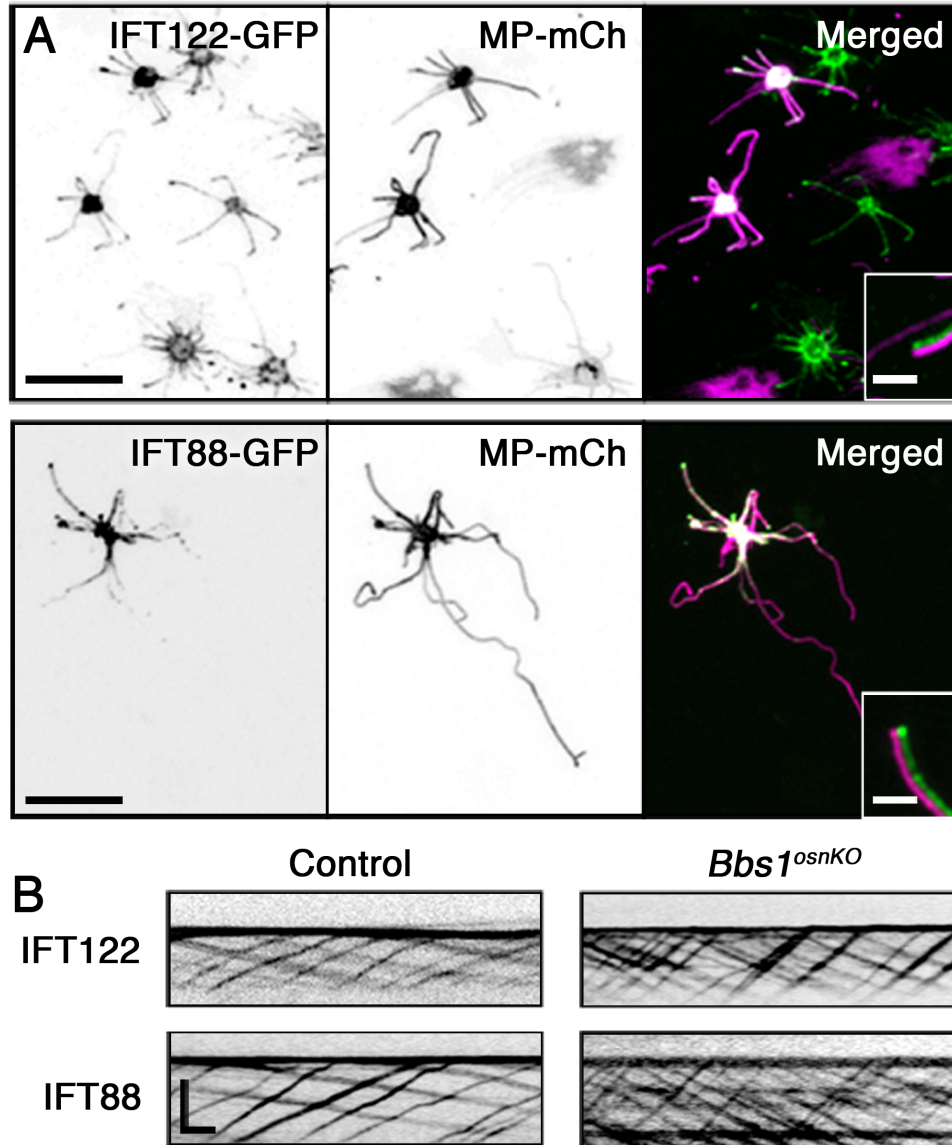

**Figure S5. Decoupling of IFT trafficking in *Bbs1*<sup>KO</sup> mice.**

(A) Representative confocal *en face* images of OSNs from *Bbs1*<sup>KO</sup> mice. Imaged OSNs were ectopically expressed (top) IFT122-GFP and (bottom) IFT88-GFP with MP-mCh a full-length cilia marker. (B) Representative kymograms from control and *Bbs1*<sup>KO</sup> mice ectopically expressing (top) IFT122-GFP and (bottom) IFT88-GFP. Compared to control recordings, *Bbs1*<sup>KO</sup> mice demonstrated increased IFT122 and IFT88 trafficking velocities. Scale bar = 10  $\mu$ m, 2.5  $\mu$ m, 10 s x 5  $\mu$ m (kymogram-B).
